# Supplementary material
Source: Springer Nature journal article supplement (https://www.springermedizin.de/resource/supplementary/12889_2012_5550_MOESM1_ESM.pdf/9495648)

**ALSWH Young (1973-1978) Cohort**

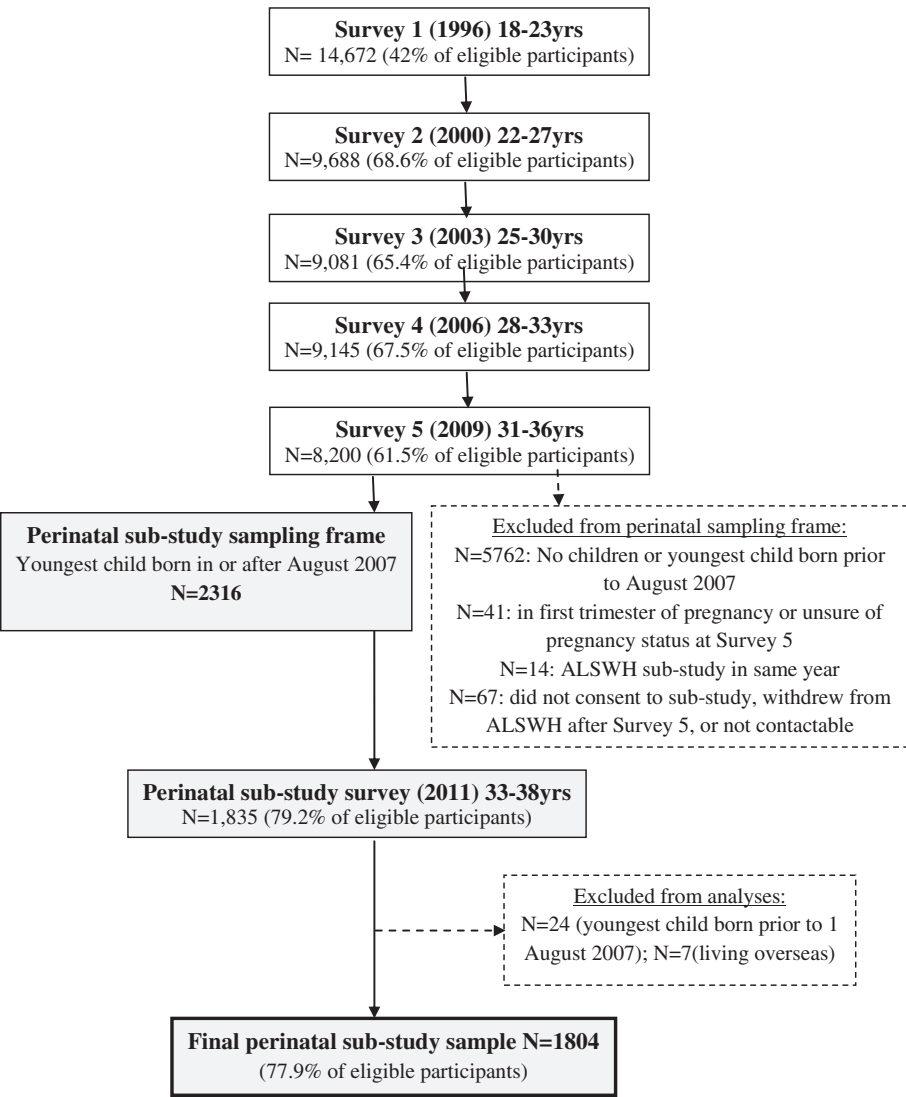

Supplement: MOESM1 [file 9495648]
